# Supplementary material
Source: PubMed Central journal article supplement (PMC3914626)
Supplement: supp_113.157800_Corrigendum_He.pdf [file supp_113.157800_Corrigendum_He.pdf]

Corrigendum for He, *GENETICS* 196 (3) 557-567.

*GENETICS*, Vol 196, 557-567, February 2014, Copyright © 2014 Genetics Society of America.

#### CORRIGENDUM

In the article by Bin Z. He *et al.* (*Genetics* 196: 557-567) entitled "Effect of Genetic Variation in a *Drosophila* Model of Diabetes-Associated Misfolded Human Proinsulin", Pengyao Jiang\* was unintentionally omitted from the author list. This has been corrected and the author list appears as shown below.

Bin Z. He, Michael Z. Ludwig, Desiree A. Dickerson, Levi Barse, Bharath Arun, Bjarni J. Vilhjálmsson, Pengyao Jiang, Soo-Young Park, Natalia A. Tamarina, Scott B. Selleck, Patricia J. Wittkopp, Graeme I. Bell, and Martin Kreitman

\*Department of Ecology and Evolution, The University of Chicago, Chicago, Illinois 60637
