# Supplementary material
Source: PubMed Central journal article supplement (PMC3914626)
Supplement: supp_113.157800_FigureS1.pdf [file supp_113.157800_FigureS1.pdf]

A

|       | 18bp | 28190 | 28141 | 28178 | 28144 | 28135 | 28171 |
|-------|------|-------|-------|-------|-------|-------|-------|
| 4bp   |      | A     | B     | C     | D     | E     | F     |
| 28240 | 1    | A1    | 1B    |       |       |       |       |
| 28231 | 2    |       | B2    | 2C    |       |       |       |
| 28138 | 3    |       |       | C3    |       |       | 3F    |
| 25204 | 4    |       |       |       | D4    | 4E    |       |
| 28211 | 5    | 5A    |       |       |       | E5    | 5F    |
| 28227 | 6    |       |       |       | 6D    |       | F6    |
| 28139 | 7    |       |       |       |       |       | F7    |
| 28122 | 8    |       |       | C8    |       |       |       |

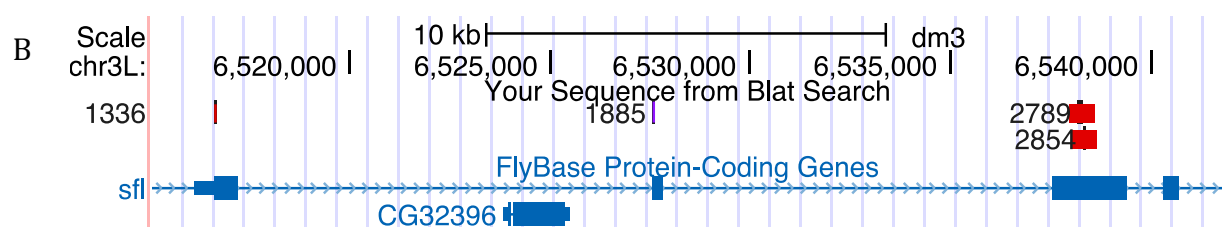

**Figure S1** Pyro-sequencing cross and assay design. (A) Cross design for pyro-sequencing. Six 18bp and eight 4bp lines were randomly chosen from the 154 DGRP lines used in GWAS. The Bloomington center stock number is listed. In each cell, the order of the letter/number indicate the direction of the cross. For example, A1 indicates that males of #28240 was crossed to virgin females of #28190. (B) pyro-sequencing assays. Four SNPs were selected within the transcribed regions so as to distinguish alleles associated with the 18/4 bp indel polymorphism.
