# Supplementary material
Source: PubMed Central journal article supplement (PMC3914626)
Supplement: supp_113.157800_FigureS2.pdf [file supp_113.157800_FigureS2.pdf]

### Male/Female Correlation in Core 40 lines

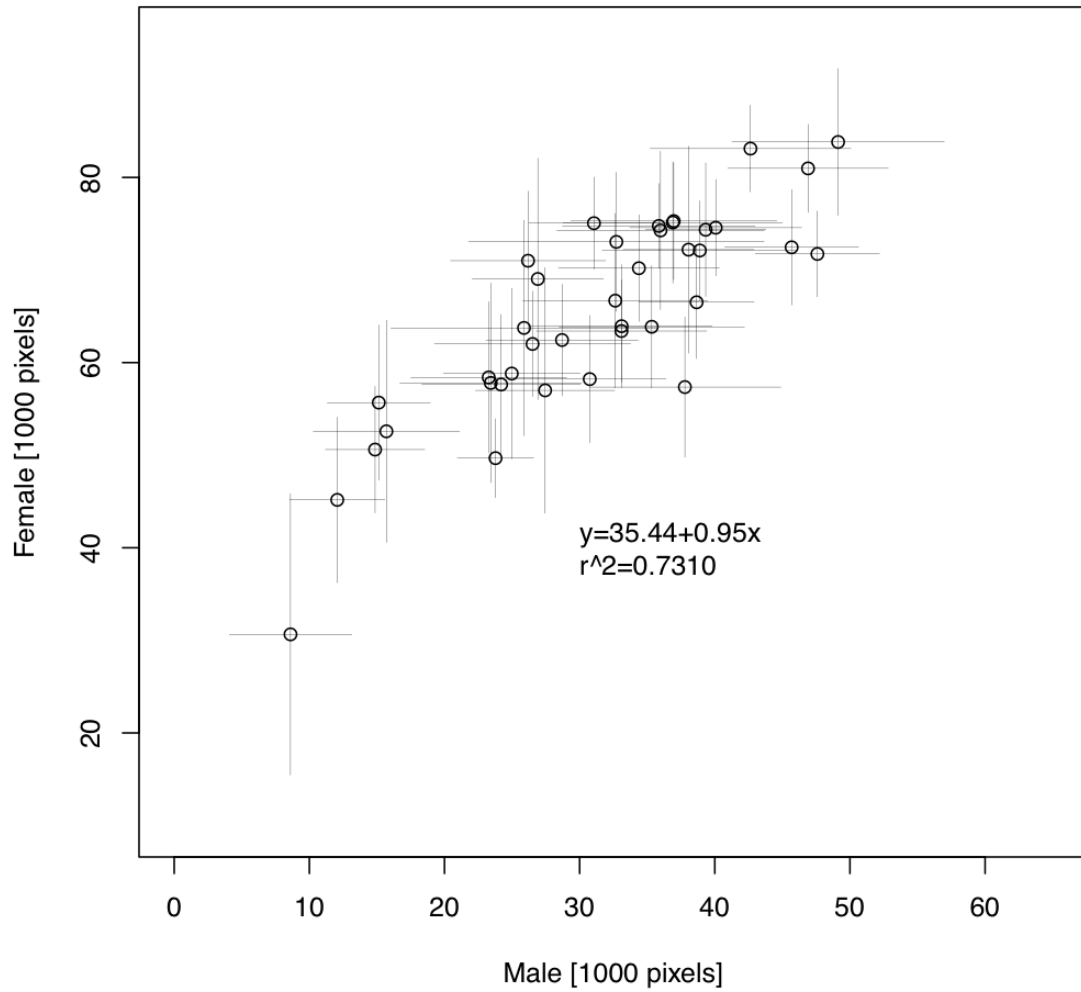

**Figure S2** Correlations of eye area between F1 males and females within the same cross. Mean  $\pm$  1 s.d. are plotted for a subset of 38 lines. The least square linear fit is indicated.
