# Supplementary material
Source: PubMed Central journal article supplement (PMC3914626)
Supplement: supp_113.157800_FigureS7.pdf [file supp_113.157800_FigureS7.pdf]

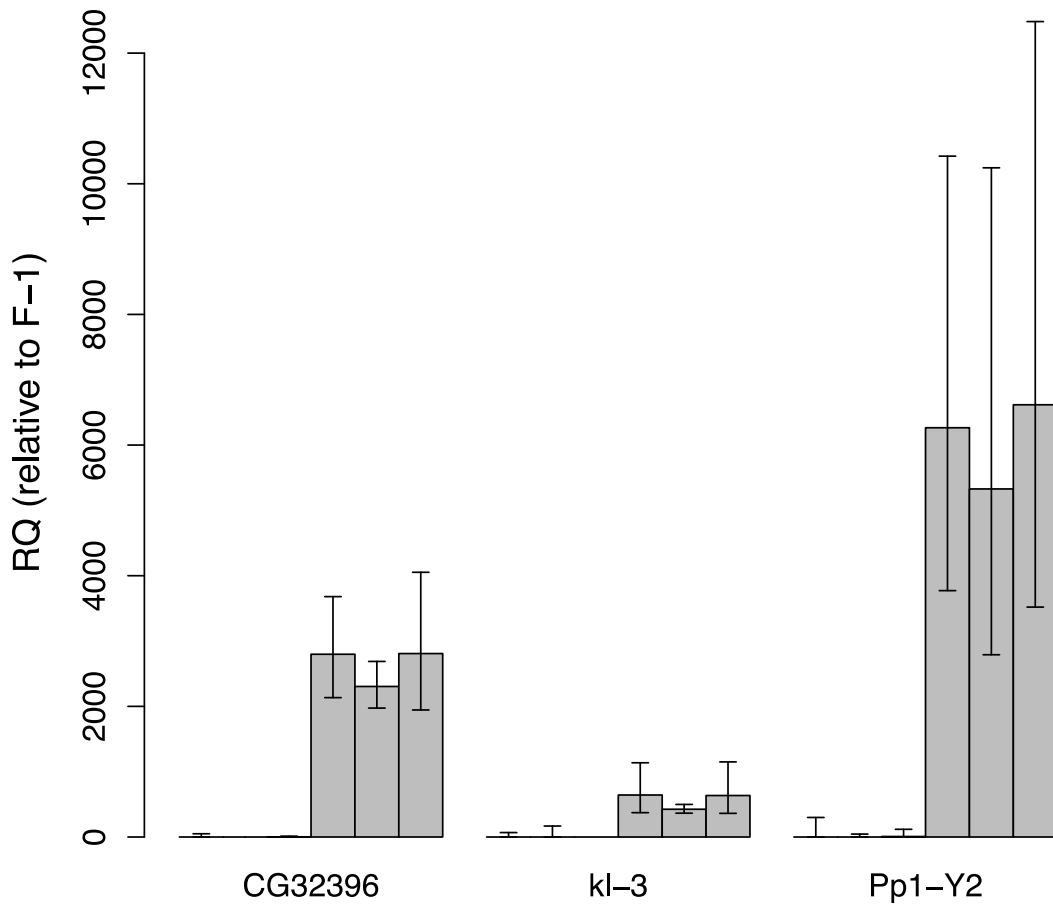

**Figure S7** Relative quantity of mRNA quantified by qRT-PCR in male and female larvae. In each category, the first three bars represent three independent female larvae sample (whole larva), each assayed with three technical replicates. The height of the bar represent the mean and the full range of RQ values were indicated by the error bars. The next three bars correspond to three independent male larvae assayed for the same gene. *kl-3* and *Pp1-Y2* are both located on the Y-chromosome and are known to have a testis-specific expression level. The RQ values were measured using *RP49* gene as the internal control, and the first female larva sample (F-1) as the reference, whose RQ is set to one.
