# Supplementary material
Source: PubMed Central journal article supplement (PMC3914626)
Supplement: supp_113.157800_FigureS8.pdf [file supp_113.157800_FigureS8.pdf]

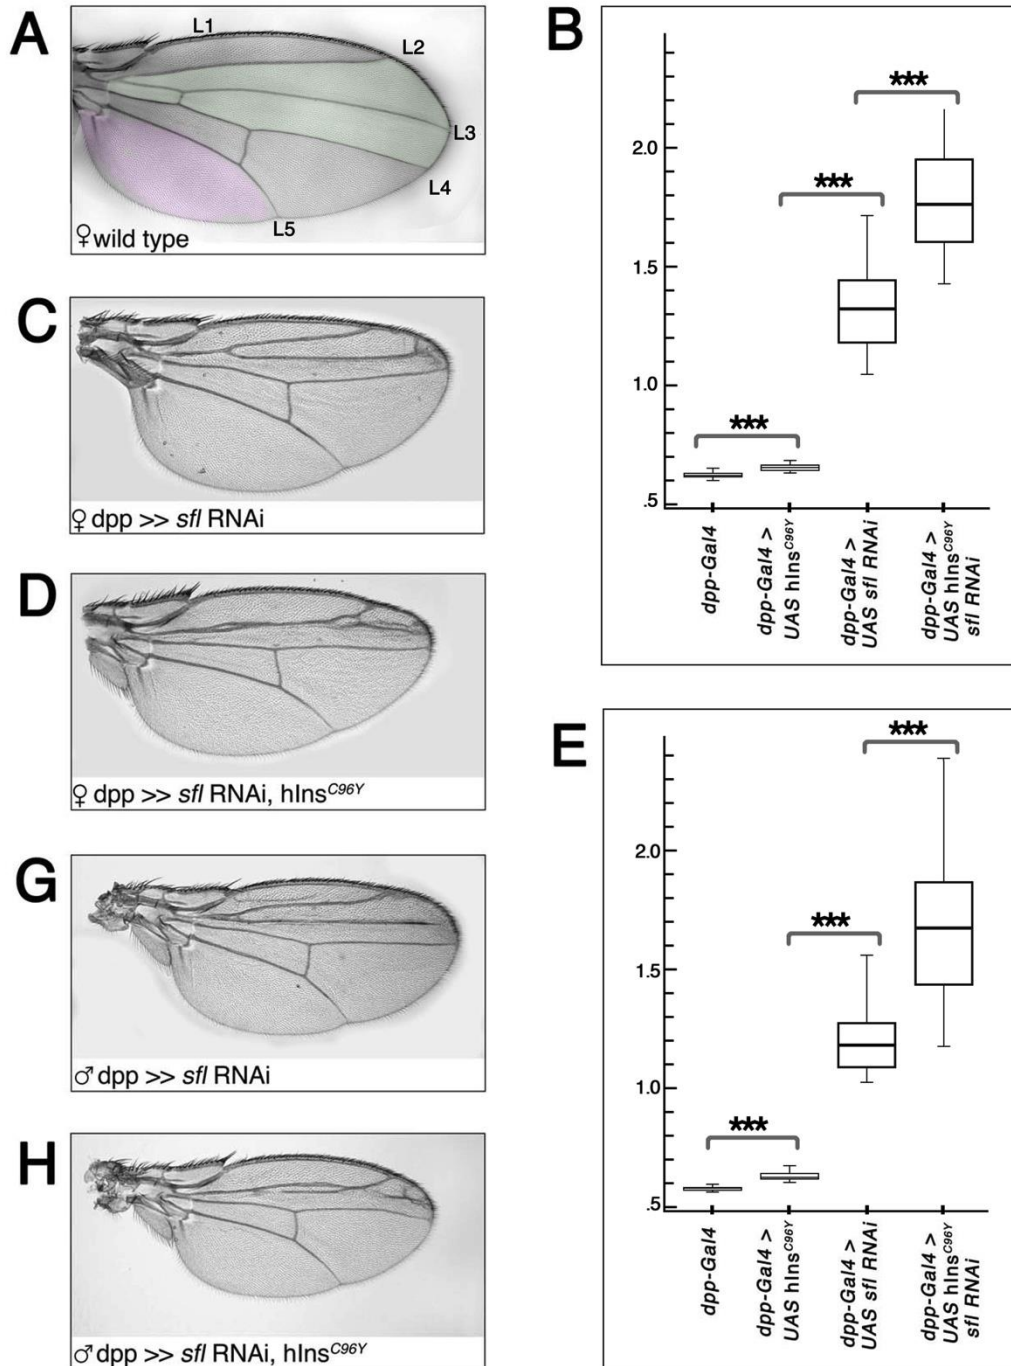

**Figure S8** Depletion of *sfl* by RNAi in the developing wing expressing *hINS<sup>C96Y</sup>* driven by *dpp-Gal4*. For both females and males, *dpp >> hINS<sup>C96Y</sup>* or *Dpp >> sfl RNAi* expression alone reduces wing area between the L2 and L4 longitudinal veins relative to the posterior-most sector of the wing (bordered by L5). This reduction is more severe in the *sfl* knockdown genotype than in the *hINA<sup>C96Y</sup>*-expressing genotype. Co-expression of *sfl RNAi* and *hINS<sup>C96Y</sup>* by *dpp-Gal4* results in the obliteration of the L3 vein and further relative reduction of the L2-L4 area.

(A): Wild type wing showing the measured regions of wing used to quantify the effects of both *sfl RNAi* and *hINS<sup>C96Y</sup>* expression in *dpp-Gal4* domain (L3-L4 intervein sector). Quantification of the (B) female or (E) male wing phenotypes generated by transgenes *dpp-Gal4*; *dpp-Gal4 > UAS-hINS<sup>C96Y</sup>*; (C, G) *dpp-Gal4 >> UAS-sfl RNAi*; and (D, H) *dpp-Gal4*

>>UAS-*sfl* RNAi; UAS-hINS<sup>C96Y</sup>. The values represent the ratio of the third posterior cell (in pink color) divided by the L2-L4 intervein sector (in green color) wing area. \*\*\*, P < 0.001; Mann-Whitney U test.  
Females: dpp-Gal4 (n= 15; Mean= 0.62), dpp-Gal4 >UAS-hINS<sup>C96Y</sup> (n= 15; Mean=0.65), dpp-Gal4 >> UAS-*sfl* RNAi (n= 23; Mean=1.3) and dpp-Gal4 >>UAS-*sfl* RNAi; UAS-hINS<sup>C96Y</sup> (n= 22; Mean=1.76).  
Males: dpp-Gal4 (n= 15; Mean=0.59), dpp-Gal4 >UAS-hINS<sup>C96Y</sup> (n= 15; Mean=0.64), dpp-Gal4 >> UAS-*sfl* RNAi (n=23; Mean=1.2 ) and dpp-Gal4 >>UAS-*sfl* RNAi; UAS-hINS<sup>C96Y</sup> (n= 29; Mean=1.68).
