# Supplementary material
Source: PubMed Central journal article supplement (PMC3914626)
Supplement: supp_113.157800_FigureS9.pdf [file supp_113.157800_FigureS9.pdf]

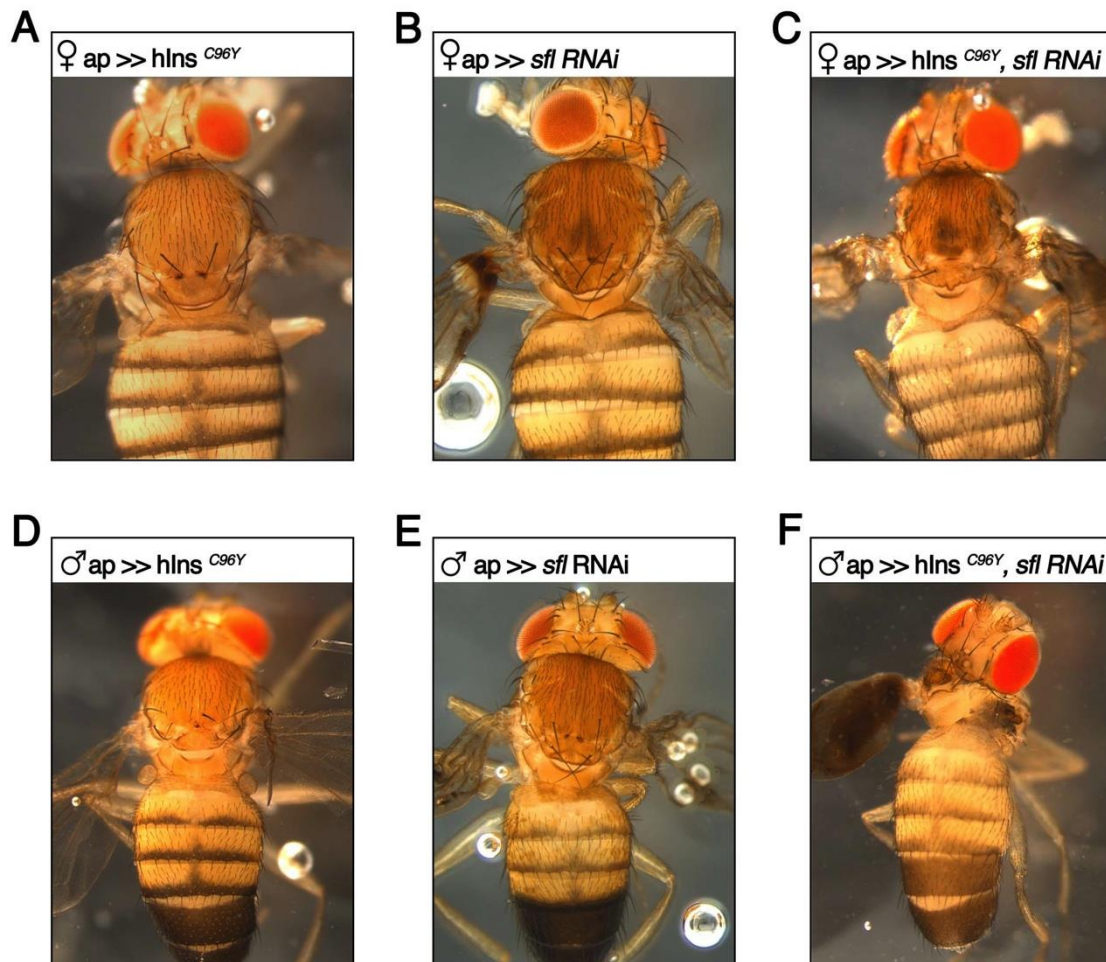

**Figure S9** Depletion of *sfl* by RNAi in the developing notum expressing *hINS<sup>C96Y</sup>* driven by *ap*-Gal4. For both females and males, *ap* > *hINS<sup>C96Y</sup>* or *ap* > *sfl* RNAi expression alone reduces notum area and causes loss of dorsal macrochaetae. Co-expression of *sfl* RNAi and *hINS<sup>C96Y</sup>* by *ap*-Gal4 results in greater destruction of the notum and macrochaetae in both sexes. However, in the male the notum and additional dorsal structures are obliterated and this phenotype is lethal.

*ap*-Gal4 > *hINS<sup>C96Y</sup>* (A) female and (D) male;  
*ap*-Gal4 > *sfl* RNAi (B) female and (E) male;  
*ap*-Gal4 >> *hINS<sup>C96Y</sup>*, *sfl* RNAi (C) female (F) male
