# Supplementary material
Source: PubMed Central journal article supplement (PMC3914626)
Supplement: supp_113.157800_FigureS10.pdf [file supp_113.157800_FigureS10.pdf]

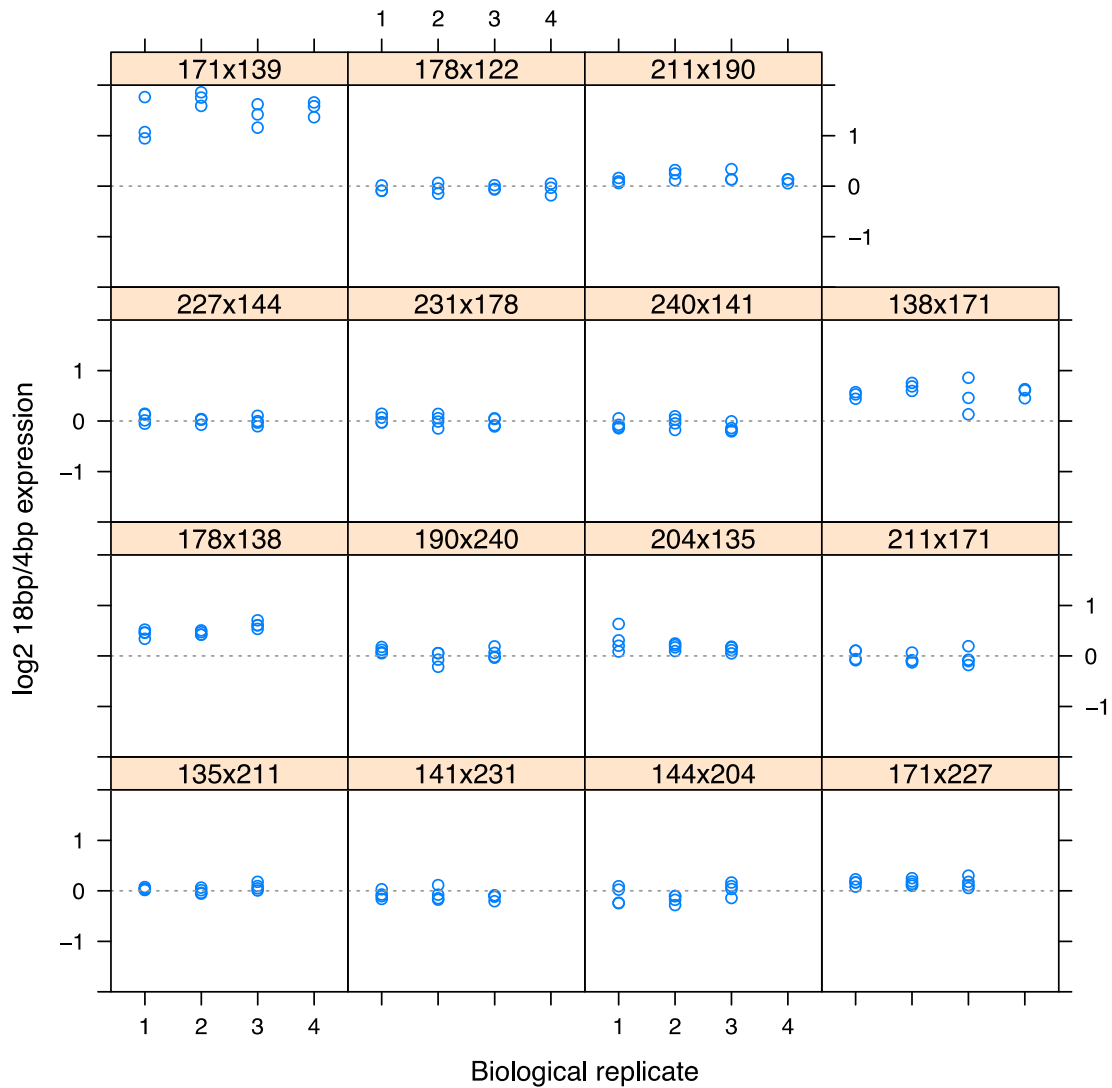

**Figure S10**  $\log_2$  transformed ratios between transcript levels associated with 18bp/4bp alleles. The allele-specific expression ratios were measured in F1 hybrid individuals by pyro-sequencing, with three (or four) biological replicates and four (or three) pyro-technical replicates, to obtain a total of 12 measurements. In each of the 15 crosses, the technical replicates were plotted in a single column, with different columns representing the biological replicates. In the titles of each panel, the last three digits in the stock number were shown for lines used in the cross.
