# Supplementary material
Source: PubMed Central journal article supplement (PMC3914626)
Supplement: supp_113.157800_FigureS11.pdf [file supp_113.157800_FigureS11.pdf]

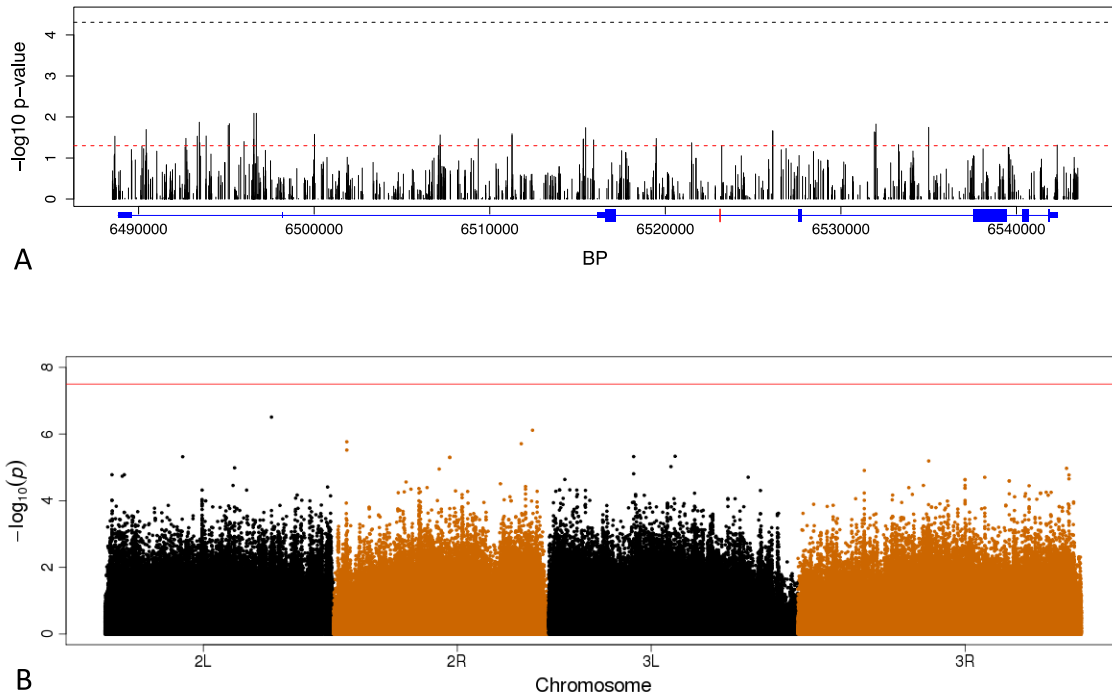

**Figure S11** Conditional regression analysis to detect additional SNPs associated with the phenotype of interest. (A) within the *sfl* locus; (B) all chromosomes. The intronic 18/4bp polymorphism in *sfl* is included in the linear model as a covariate. The two dotted lines in (A) correspond to a single test 0.05 level (red) and the multiple testing corrected 0.05 level using Bonferroni's method (blue). The red line in (B) represents the Bonferroni corrected 0.05 level.
