# Supplementary material
Source: PubMed Central journal article supplement (PMC3914626)
Supplement: supp_113.157800_TableS3.pdf [file supp_113.157800_TableS3.pdf]

**Tables S1-S2**Available for download at <http://www.genetics.org/lookup/suppl/doi:10.1534/genetics.113.157800/-/DC1>**Table S1** Raw data**Table S2** DRRP lines used in this study**Table S3** Sequence primers used in this study

| Name            | Sequence (5'→3')         |
|-----------------|--------------------------|
| <b>qRT-PCR</b>  |                          |
| sfl_F1          | TCGATACGGGCGTGTTAATGGAC  |
| sfl_R1          | TTGATAATGGGTGCGGGATGCG   |
| CG32396_F1      | AGCGGAGATTGGGTCGAAATGAG  |
| CG32396_R1      | CATGTGAAATCACGTGCCAGAAAG |
| kl-3F1          | ATGGCAAACGTAGACCCACCTC   |
| kl-3R1          | GTACCGGGCGGACGATTCTTTAG  |
| Pp1-Y2F1        | TTTGTGTGCACGGCGGTCTCAG   |
| Pp1-Y2R1        | ACGTCACATGGTCGGGCTAATTG  |
| RP49-F1         | CGGATCGATATGCTAAGCTGT    |
| RP49-R1         | GCGCTTGTTCGATCCGTA       |
| <b>Pyro-seq</b> |                          |
| 1336F1          | CGGGCGGCAATCAACATAA      |
| 1336R1          | CGGTCACGGAGCTACCAAATT    |
| 1336S1          | CTCATTAAGCAGCCG          |
| 2789F1          | GACTGCGACCAGATGATGTGAG   |
| 2789R1          | CTTCCCTCGTGCCATGATGATA   |
| 2789S1          | TTCCCGAGAATCCA           |
| 2854F1          | CGGGAAAATACTATCATCATGGC  |
| 2854R1          | GTGCGAAAACCAGTTGAACTC    |
| 2854S1          | TCCTGAACGTTCTGC          |
| 1885F1          | TAATGGACTTATTCAACGCGACAC |
| 1885R1          | TGTGTTTGCCACCAGAGTTG     |
| 1885S1          | CGGCAGTTGATAATGG         |
