# Supplementary material
Source: PubMed Central journal article supplement (PMC3914626)
Supplement: supp_113.157800_TableS4.pdf [file supp_113.157800_TableS4.pdf]

**Table S4 Power calculation for GWAS with 154 lines**

| Minor Allele Frequency | Effect Size* |      |      |      |      |
|------------------------|--------------|------|------|------|------|
|                        | 0.75         | 1    | 1.25 | 1.5  | 2    |
| 0.01                   | 0.00         | 0.00 | 0.00 | 0.00 | 0.00 |
| 0.05                   | 0.00         | 0.00 | 0.01 | 0.03 | 0.26 |
| 0.1                    | 0.00         | 0.02 | 0.12 | 0.39 | 0.94 |
| 0.2                    | 0.02         | 0.19 | 0.63 | 0.94 | 1.00 |
| 0.3                    | 0.06         | 0.45 | 0.90 | 1.00 | 1.00 |
| 0.4                    | 0.11         | 0.60 | 0.96 | 1.00 | 1.00 |
| 0.5                    | 0.13         | 0.66 | 0.97 | 1.00 | 1.00 |

\* Effect size is measured as the shift in the phenotype mean in units of s.d. for the trait

The calculation is done using the t-distribution. The R-code is attached below:

```
myPower.t <- function(effect.size=1,alpha=0.05,m,n){
  ## Power for GWAS t test
  ## calculate power for a t test comparing two populations with equal variance but unequal sample sizes
  ## m, n: sample size of each allele class, not to be confused with m above
  df = m+n-2
  A = 1/sqrt(1/m+1/n) ## factor for calculating t statistics
  T = qt(1-alpha/2,m+n-2)
  T1 <- T-effect.size*A
  beta <- pt(T1,m+n-2)
  return(1-beta)
}
## plot power of GWAS t test ##
alpha1=.05/1.37e6
power <- NULL
effect.size <- c(0.75,1,1.25,1.5,2)
freq <- c(0.01,0.05,0.1,0.2,0.3,0.4,0.5)
N = 154 # size of GWAS mapping population
for(p in freq){
  m = as.integer(N*p)
  n = N-m
  power <- rbind(power, sapply(effect.size,function(x) myPower.t(x,alpha1,m,n)))
}
dimnames(power) <- list("freq"=freq,"effect.size"=effect.size)
```
