# Supplementary material
Source: PubMed Central journal article supplement (PMC3914626)

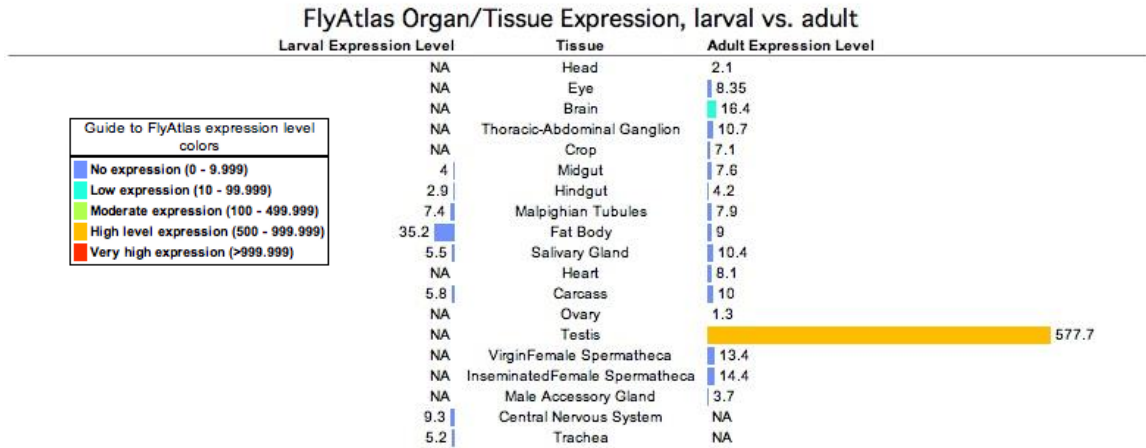

A

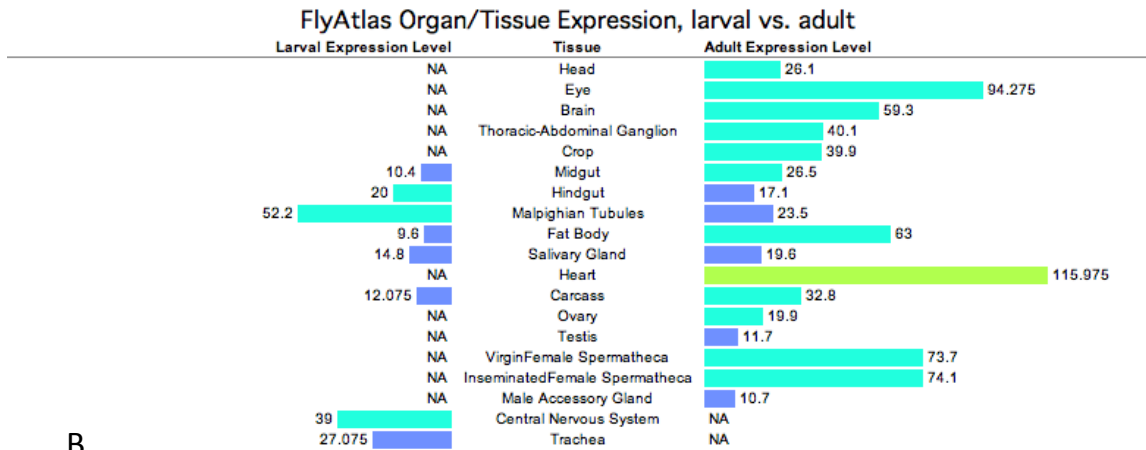

B

**Figure S5** FlyAtlas expression report for CG32396 and sfl. (A) CG32396 (B) sfl. Figure obtained through FlyBase.

Supplement: supp_113.157800_FigureS5.pdf [file supp_113.157800_FigureS5.pdf]
